# Supplementary material
Source: PubMed Central journal article supplement (PMC5075030)

Supplementary Figures – Preliminary Dose Ranging Studies

**Figure 1: Dose response curve for buprenorphine (10ml/kg, i.p.) in the warm water tail withdrawal assay in adult CD1 mice.** All values are mean +/- SEM, n=6 per group. Antinociceptive effects are shown as % maximum possible effect (%MPE). Two-way repeated measures mixed model analysis revealed a significant interaction of Treatment \* Time ( $F_{(9,60)} = 19.90, p < 0.001$ ). Buprenorphine 1 mg/kg and 3 mg/kg treated mice showed significant antinociceptive effects compared to saline or buprenorphine 0.3 mg/kg treated groups (\*\*\*)  $p < 0.001$ ) at 60 and 120 min post-administration. Buprenorphine 3mg/kg effects were sustained at 240 min post-administration (##  $p < 0.01$  compared to saline).

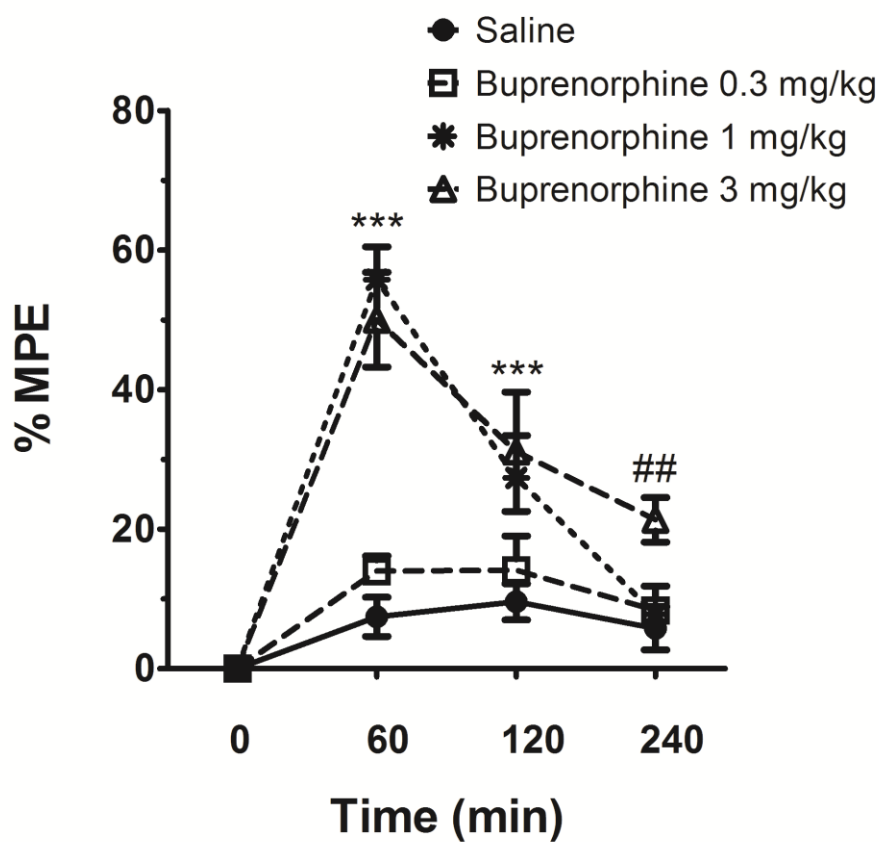

**Figure 2: Locomotor effects of buprenorphine and naltrexone (10ml/kg, i.p.) in the open field in adult CD1 mice.** All values are mean  $\pm$  SEM, n=6 per group. The whole distance travelled during a 10 min test is shown. Neither buprenorphine (0.3, 1, and 3 mg/kg) nor naltrexone (1 mg/kg) had any significant effects on total locomotion, compared to saline treated controls.

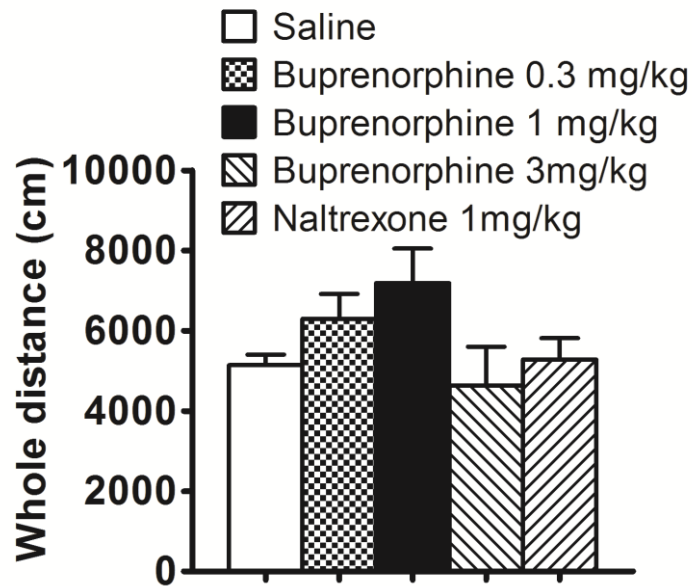

Supplement: NIHMS821198-supplement-supplementary_figures.pdf [file NIHMS821198-supplement-supplementary_figures.pdf]
